# Supplementary material for: Determination of the Minimum Detectable Change in the Total and Segmental Volumes of the Upper Limb, Evaluated by Perimeter Measurements
Source: Healthcare (Basel). 2020 Aug 21;8(3):285. doi: 10.3390/healthcare8030285 (PMC7551255; doi:10.3390/healthcare8030285)
Supplement: Supplementary file 1 [file healthcare-08-00285-s001.xlsx]

## Sheet: Hoja1
		Type in measurements in the blue cells
		Length between measuring points (cm) =
				PERIMETER Nº	cm	Segment		Radius 1	Radius 2		H (height)	volume mL
				1
						I
				2
						II
				3
						III
				4
						IV
				5
						V
				6
						VI
				7
						VII
				8
						VIII
				9
						IX
				10
						X
				11
						XI
				12
						XII
				13
						Upper limb (ml)		0
